# Supplementary material
Source: Elsevier journal article supplement (https://www.sciencedirect.com/science/article/pii/S0300893218303038)
Supplement: mmc1 [file mmc1.pdf]

## MATERIAL SUPLEMENTARIO

**Tabla 1 del material suplementario**

Características de la cohorte de pacientes incidentes en función del sexo<sup>a</sup>

|                                              |                 | Incidentes        |                   | Total     |         |
|----------------------------------------------|-----------------|-------------------|-------------------|-----------|---------|
|                                              |                 | Varón             | Mujer             |           | p       |
| <b>Total</b>                                 |                 | 3.528             | 4.730             | 8.258     |         |
| <b>Grupo de edad (%)</b>                     | <b>0-44</b>     | 2,1 <sup>b</sup>  | 0,5 <sup>c</sup>  | 1,2       | < 0,001 |
|                                              | <b>45-64</b>    | 15,5 <sup>b</sup> | 4,9 <sup>c</sup>  | 9,5       |         |
|                                              | <b>65-74</b>    | 19,9 <sup>b</sup> | 15,5 <sup>c</sup> | 17,4      |         |
|                                              | <b>75-84</b>    | 41,9 <sup>c</sup> | 47,6 <sup>b</sup> | 45,1      |         |
|                                              | <b>85 y más</b> | 20,6 <sup>c</sup> | 31,4 <sup>b</sup> | 26,8      |         |
| <b>Media de edad (mediana)</b>               |                 | 75,1 (78)         | 80,0 (81)         | 77,9 (80) | < 0,001 |
| <b>Tasas por 100.000</b>                     | <b>0-44</b>     | 3,1               | 1,1               | 2,1       |         |
|                                              | <b>45-64</b>    | 65,4              | 28,0              | 46,7      |         |
|                                              | <b>65-74</b>    | 285,9             | 264,8             | 274,7     |         |
|                                              | <b>75-84</b>    | 902,7             | 1002,4            | 960,4     |         |
|                                              | <b>85 y más</b> | 1.809,5           | 1.886,1           | 1.860,2   |         |
|                                              | <b>Total</b>    | 95,4              | 130,0             | 112,7     |         |
| <b>Estancia media (mediana)</b>              |                 | 9,2 (7)           | 9,0 (7)           | 9,1 (7)   | N.S.    |
| <b>Mortalidad intrahospitalaria (%)</b>      |                 | 8,2               | 9,4               | 0,1       | N.S.    |
| <b>Índice Elixhauser (%)</b>                 | <b>0-3</b>      | 44,2 <sup>b</sup> | 41,7 <sup>c</sup> | 42,8      | 0,048   |
|                                              | <b>4-5</b>      | 42,3              | 43,6              | 43,0      |         |
|                                              | <b>Resto</b>    | 13,5              | 14,8              | 14,2      |         |
| <b>Comorbilidades (%)</b>                    |                 |                   |                   |           |         |
| <b>Hipertensión</b>                          |                 | 66,6              | 72,1              | 69,8      | < 0,001 |
| <b>Arritmia cardiaca</b>                     |                 | 46,9              | 53,5              | 50,7      | < 0,001 |
| <b>Fallo renal</b>                           |                 | 24,1              | 21,2              | 22,4      | 0,001   |
| <b>Enfermedad de la circulación pulmonar</b> |                 | 13,0              | 16,3              | 14,9      | < 0,001 |
| <b>Obesidad</b>                              |                 | 11,6              | 16,9              | 14,6      | < 0,001 |
| <b>Enfermedad pulmonar crónica</b>           |                 | 20,7              | 9,3               | 14,2      | < 0,001 |
| <b>Diabetes no complicada</b>                |                 | 12,5              | 12,7              | 12,6      | N.S     |
| <b>Anemia por otras deficiencias</b>         |                 | 8,7               | 12,2              | 10,7      | < 0,001 |
| <b>Otras enfermedades neurológicas</b>       |                 | 5,7               | 8,8               | 7,5       | < 0,001 |
| <b>Enfermedad vascular periférica</b>        |                 | 9,5               | 3,8               | 6,3       | < 0,001 |
| <b>Depresión</b>                             |                 | 2,8               | 8,5               | 6,1       | < 0,001 |
| <b>Alteración de fluidos y electrolitos</b>  |                 | 4,5               | 6,3               | 5,5       | < 0,001 |
| <b>Diabetes complicada</b>                   |                 | 5,4               | 5,1               | 5,2       | N.S     |
| <b>Enfermedad hepática</b>                   |                 | 5,9               | 3,3               | 4,4       | < 0,001 |
| <b>Anemia por pérdida de sangre</b>          |                 | 2,4               | 2,3               | 2,3       | N.S     |

NS: no significativo

<sup>a</sup>Basado en la información del primer alta identificada en el periodo (episodio índice)

<sup>b</sup>Valores superiores a los esperados.

<sup>c</sup>Valores observados inferiores a los esperados.

## Tabla 2 del material suplementario

Supervivencia por insuficiencia cardiaca: Pacientes incidentes y recurrentes.

|                                                        | <i>Hazard ratio</i> | IC95%      | <i>Log rank P</i> |
|--------------------------------------------------------|---------------------|------------|-------------------|
| Mujer                                                  | 0,882               | 0,77-0,87  | <0,001            |
| De 0 a 44 años (base)                                  |                     |            | <0,001            |
| 45 a 64 años                                           | 2,271               | 1,30-3,98  | <0,001            |
| 65 a 74 años                                           | 3,545               | 2,04-6,14  | <0,001            |
| 75 a 84 años                                           | 6,365               | 3,68-10,99 | <0,001            |
| 85 y más años                                          | 11,44               | 6,62-19,79 | <0,001            |
| Elixhauser (0-3 puntos, basal)                         |                     |            | <0,001            |
| 4-5                                                    | 1,338               | 1,25-1,42  | <0,001            |
| 6 y más                                                | 1,753               | 1,61-1,91  | <0,001            |
| Estancia hospitalaria ingreso índice (0-3 días, basal) |                     |            | <0,001            |
| 4 o 5 días                                             | 1,020               | 0,91-1,13  | 0,716             |
| 6 y más                                                | 1,231               | 1,12-1,34  | <0,001            |

IC95%: intervalo de confianza del 95%.

Test de *log rank* (Mantel-Cox),  $p < 0,001$

**Tabla 3 del material suplementario**

Tiempo hasta el reingreso. Pacientes incidentes y recurrentes

| <b>Por insuficiencia cardiaca</b>                             |                     |              |          |
|---------------------------------------------------------------|---------------------|--------------|----------|
|                                                               | <b>Hazard ratio</b> | <b>IC95%</b> | <b>p</b> |
| <b>Mujer</b>                                                  | 1,10                | 1,02-1,19    | 0,015    |
| <b>Edad de 0 a 44 años (base)</b>                             |                     |              |          |
| 45 a 64 años                                                  | 3,03                | 1,66-5,52    | <0,001   |
| 65 a 74 años                                                  | 3,26                | 1,80-5,91    | <0,001   |
| 75 a 84 años                                                  | 3,70                | 2,05-6,67    | <0,001   |
| 85 y más años                                                 | 3,16                | 1,75-5,72    | <0,001   |
| <b>Elixhauser (0-3 puntos, basal)</b>                         |                     |              |          |
| 4-5                                                           | 1,28                | 1,18-1,39    | <0,001   |
| 6 y más                                                       | 1,71                | 1,53-1,91    | <0,001   |
| <b>Por causa cardiovascular</b>                               |                     |              |          |
| <b>Mujer</b>                                                  | 1,00                | 0,93-1,07    | 0,910    |
| <b>Edad de 0 a 44 años (base)</b>                             |                     |              |          |
| 45 a 64 años                                                  | 1,59                | 1,11-2,27    | 0,012    |
| 65 a 74 años                                                  | 1,63                | 1,15-2,33    | 0,006    |
| 75 a 84 años                                                  | 1,67                | 1,17-2,36    | 0,004    |
| 85 y más años                                                 | 1,32                | 0,93-1,88    | 0,123    |
| <b>Elixhauser (0-3 puntos, basal)</b>                         |                     |              |          |
| 4-5                                                           | 1,24                | 1,16-1,33    | <0,001   |
| 6 y más                                                       | 1,71                | 1,55-1,89    | <0,001   |
| <b>Estancia hospitalaria ingreso índice (0-3 días, basal)</b> |                     |              |          |
| 4 o 5 días                                                    | 0,94                | 0,84-1,05    | 0,270    |
| 6 y más                                                       | 0,91                | 0,83-1,00    | 0,058    |
| <b>Por todas las causas</b>                                   |                     |              |          |
| <b>Mujer</b>                                                  | 0,93                | 0,88-0,98    | 0,010    |
| <b>Edad de 0 a 44 años (base)</b>                             |                     |              |          |
| 45 a 64 años                                                  | 1,13                | 0,86-1,49    | 0,380    |
| 65 a 74 años                                                  | 1,33                | 1,02-1,75    | 0,038    |
| 75 a 84 años                                                  | 1,50                | 1,15-1,96    | 0,003    |
| 85 y más años                                                 | 1,41                | 1,07-1,85    | 0,013    |
| <b>Elixhauser (0-3 puntos, basal)</b>                         |                     |              |          |
| 4-5                                                           | 1,33                | 1,26-1,41    | <0,001   |
| 6 y más                                                       | 1,94                | 1,78-2,12    | <0,001   |

IC95%: Intervalo de confianza del 95%.

Regresión de Fine-Gray con muerte como riesgo competitivo.

**Tabla 4 del material suplementario**

Cohorte de los pacientes incidentes fallecidos durante el seguimiento: diagnóstico principal de los reingresos

|                                        | Episodios | Episodios | %     | %    |
|----------------------------------------|-----------|-----------|-------|------|
| Insuficiencia cardíaca                 | 3.407     |           | 28,7  |      |
| Otras cardiovasculares                 | 1.512     |           | 12,7  |      |
| Cardiopatía isquémica                  |           | 525       |       | 4,4  |
| T. Conducción/arritmias                |           | 386       |       | 3,3  |
| Complicaciones asistencia/dispositivos |           | 57        |       | 0,5  |
| Resto                                  |           | 544       |       | 4,6  |
| Resto                                  | 6.948     |           | 58,5  |      |
| Respiratorias                          |           | 2.793     |       | 23,5 |
| Neoplasias                             |           | 424       |       | 3,6  |
| Cerebrovasculares                      |           | 351       |       | 3,0  |
| Endocrino                              |           | 282       |       | 2,4  |
| Fracturas/traumatismos                 |           | 233       |       | 2,0  |
| Insuficiencia renal (aguda/crónica)    |           | 241       |       | 2,0  |
| Otras urinario                         |           | 410       |       | 3,5  |
| Sepsis                                 |           | 276       |       | 2,3  |
| Complicaciones asistencia/dispositivos |           | 113       |       | 1,0  |
| Otras carácter médico                  |           | 1.578     |       | 13,3 |
| Otras carácter quirúrgico              |           | 247       |       | 2,1  |
| Total                                  | 11.867    |           | 100,0 |      |

En base al seguimiento de 4.368 pacientes, de los que reingresaron 3.678 (84,2%).

## Figura del material suplementario

Personas ingresadas por insuficiencia cardiaca, tendencia del porcentaje de pacientes nuevos por año

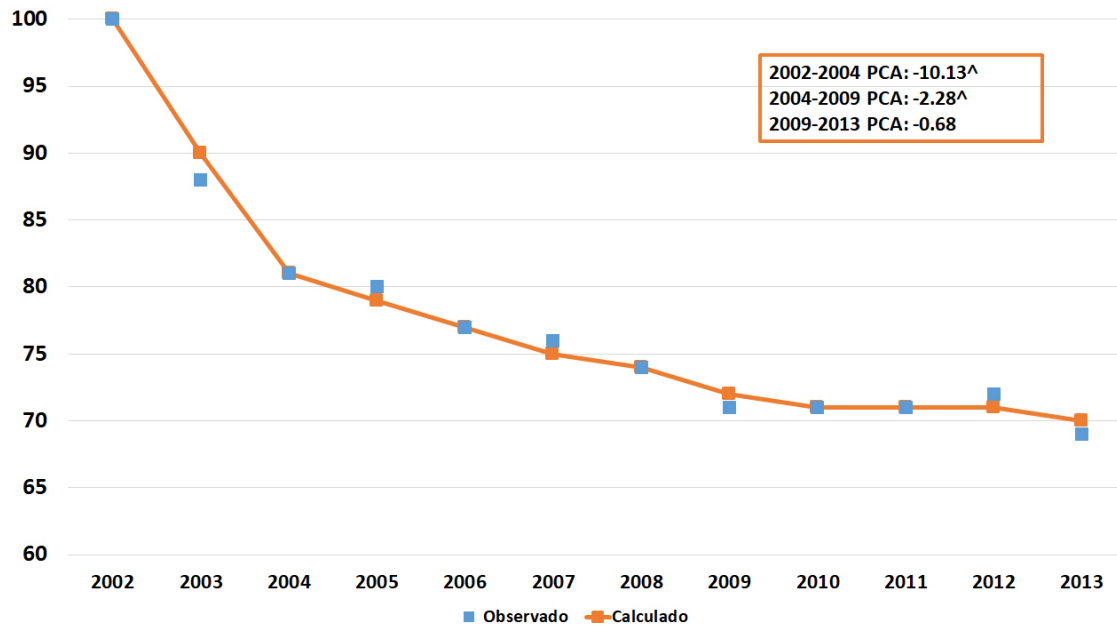

Regresión de *joinpoint*. PCA: porcentaje de cambio anual.

<sup>^</sup>El PCA tiene una diferencia estadísticamente significativa de 0.
